# Supplementary material
Source: HighWire-hosted journal article supplement (https://jitc.bmj.com/content/11/12/e007705)
Supplement: inline-supplementary-material-1 [file inline-supplementary-material-1.pdf]

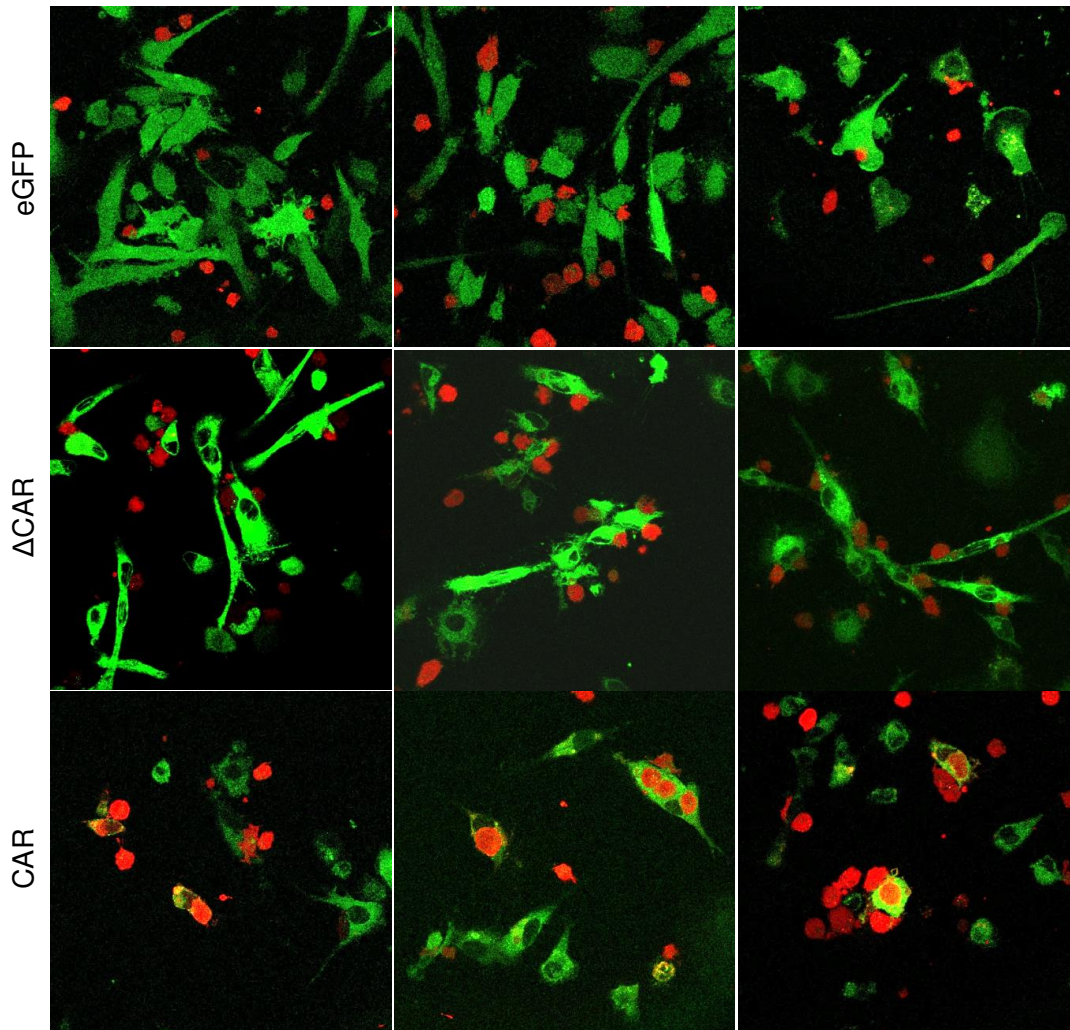

**Supplemental Figure 1.** Assessment of cord blood-derived CAR-macrophage phagocytosis of CD19<sup>+</sup> Raji cells.

Additional representative confocal microscopy images showing phagocytosis of CD19<sup>+</sup> Raji cells (mCherry) by macrophages (eGFP) (63x oil immersion objective of the Leica DMi8 confocal microscope, scale bar: 20 μm).
