# Supplementary material
Source: HighWire-hosted journal article supplement (https://jitc.bmj.com/content/11/12/e007705)
Supplement: inline-supplementary-material-2 [file inline-supplementary-material-2.pdf]

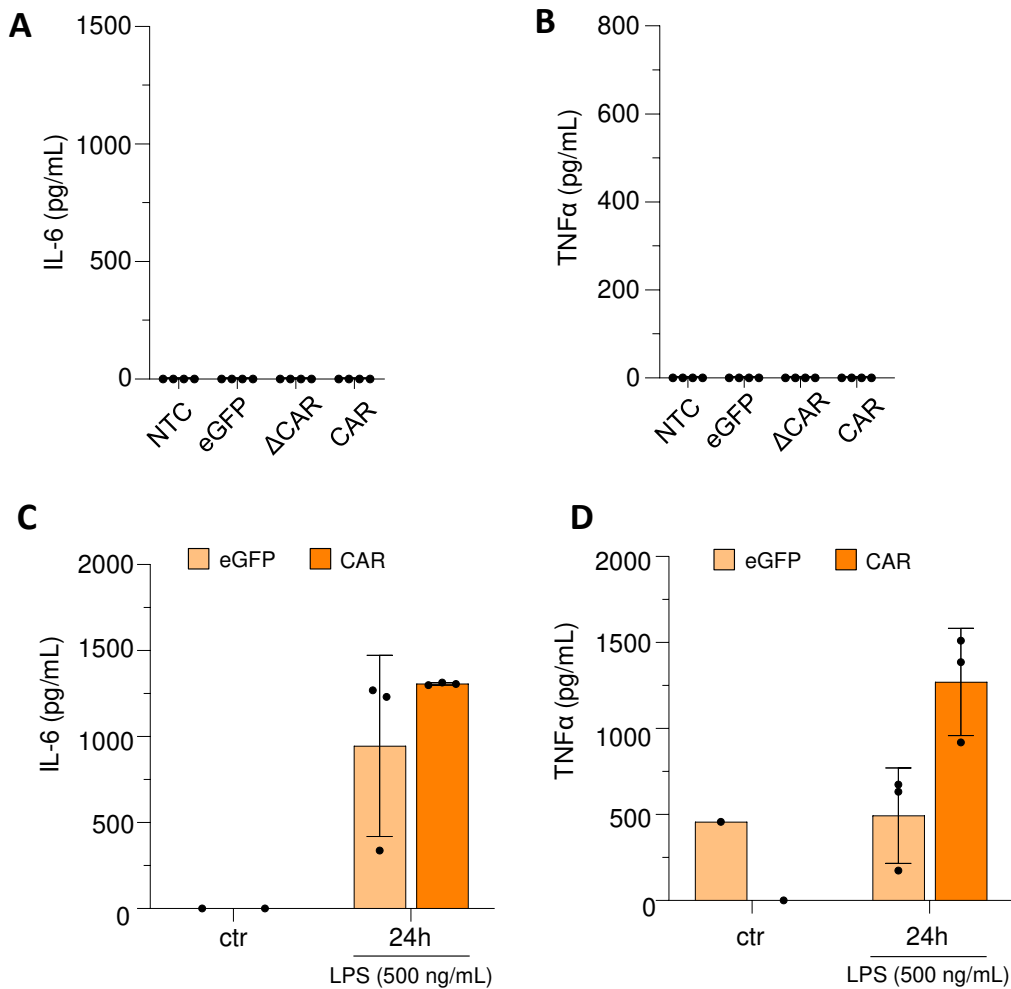

**Supplemental Figure 2.** Assessment of cytokine secretion by CAR-macrophages  
(A) IL-6 secretion (B) TNFα secretion from the seeded CD34<sup>+</sup> cell-derived macrophages without the addition of target cells. Cytokine secretion of (C) IL-6 secretion, and (D) TNFα from the seeded eGFP or CAR-iMacs with or without (ctr) LPS stimulation for 24h. (n=3-4, mean). All data are represented as the mean ± SD.
