# Supplementary material
Source: HighWire-hosted journal article supplement (https://jitc.bmj.com/content/11/12/e007705)
Supplement: inline-supplementary-material-6 [file inline-supplementary-material-6.pdf]

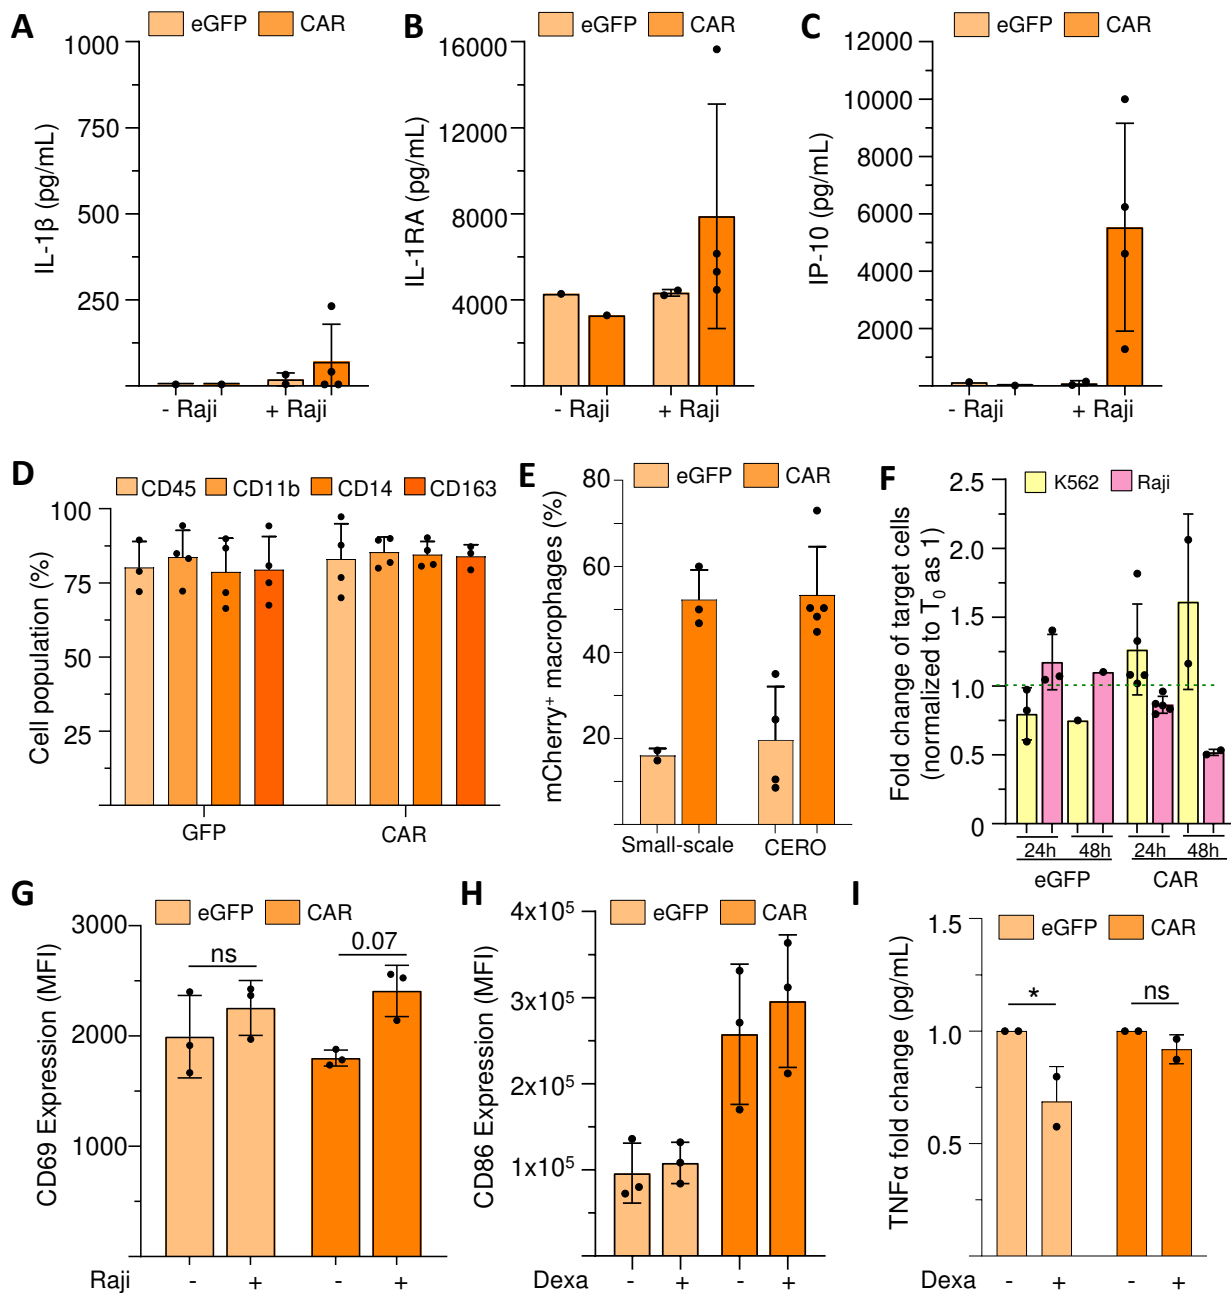

**Supplemental Figure 6.** Phenotypic and functional characterization of CERO bioreactor-generated-CAR iMacs.

**(A)** IL-1 $\beta$  secretion, **(B)** IL-1RA secretion and **(C)** IP-10 secretion from eGFP and CAR-iMacs +/- the addition of CD19<sup>+</sup> Raji target cells (n=2-4). **(D)** Surface marker expression profile of eGFP and CAR-iMacs by flow cytometric analyses (n=3-4). **(E)** Flow cytometric analyses of percentage (%) of mCherry<sup>+</sup> macrophages (eGFP /CAR-iMacs) after co-culture with target cells for 4 h. Comparison of small scale vs. CERO bioreactor derived iMacs **(F)** Flow cytometric analyses of K562 and Raji cells over time after co-culture with eGFP/CAR-iMacs for 24h and 48h. **(G)** Flow cytometric analyses of T cell activation after 24h of incubation with supernatants from co-cultures (eGFP/CAR-iMacs and Raji cells for 4h) (CD69 expression) .**(H)** Flow cytometric analyses of CD86 expression and **(I)** TNF $\alpha$  secretion of eGFP or CAR-iMacs after stimulation with Dexamethasone for 4h. Data of **(F) – (I)** are represented as the mean  $\pm$  SD of n = 3 biological replicates. Statistical significance was calculated with one-way ANOVA using multiple comparisons.
